# Supplementary material for: Na4Ga8S14: a Ga-enriched wide band gap ternary alkali-metal sulfide with unique [Ga12S42] 12-membered rings
Source: Royal Society of Chemistry journal article supplement (doi:10.1039/d2dt00295g), 2022-01-01
Supplement: d2dt00295g1.pdf [file d2dt00295g1.pdf]

## Supporting Information

### **Na<sub>4</sub>Ga<sub>8</sub>S<sub>14</sub>: A Ga-riched wide band gap ternary alkali-metal sulfide with unique [Ga<sub>12</sub>S<sub>42</sub>] 12-membered rings**

Ling Luo<sup>†, a, b</sup>, Linan Wang<sup>†, c</sup>, Chen Bai<sup>d</sup>, Jiazheng Zhou<sup>\*, a, b</sup>, Lai Wei<sup>, a, b</sup>, Xin Su<sup>\*, a, b</sup>

*a: School of Physical Science and Technology, Yili Normal University, Yining 835000, China.*

*b: Xinjiang Laboratory of Phase Transitions and Microstructures of Condensed Matter Physics, Yi Li Normal University, Yining 835000, China*

*c: Center of Materials Science and Optoelectronics Engineering, University of Chinese Academy of Sciences, Beijing 100049, China.*

*d: College of Chemistry and Chemical Engineering, Xinjiang Normal University, Urumqi, Xinjiang 830054, China.*

‡ These authors contributed equally.

\* Corresponding authors.

*E-mail address: [suxin\\_phy@sina.com](mailto:suxin_phy@sina.com); [phy\\_zhoujiazheng@sina.com](mailto:phy_zhoujiazheng@sina.com)*

Table S1. Crystal data and structure refinement for Na<sub>4</sub>Ga<sub>8</sub>S<sub>14</sub>.

|                                                                                                                                                      |                                                 |
|------------------------------------------------------------------------------------------------------------------------------------------------------|-------------------------------------------------|
| Empirical formula                                                                                                                                    | Na <sub>4</sub> Ga <sub>8</sub> S <sub>14</sub> |
| Formula weight (g·mol <sup>-1</sup> )                                                                                                                | 549.28                                          |
| Crystal system                                                                                                                                       | Orthorhombic                                    |
| Space group                                                                                                                                          | <i>Pbca</i>                                     |
| <i>a</i> (Å)                                                                                                                                         | 13.5260(4)                                      |
| <i>b</i> (Å)                                                                                                                                         | 11.4979(3)                                      |
| <i>c</i> (Å)                                                                                                                                         | 29.9592(9)                                      |
| $\alpha$ (deg)                                                                                                                                       | 90                                              |
| <i>V</i> (Å <sup>3</sup> )                                                                                                                           | 4659.3(2)                                       |
| <i>Z</i>                                                                                                                                             | 8                                               |
| D <sub>c</sub> (g·cm <sup>-3</sup> )                                                                                                                 | 3.132                                           |
| $\mu$ (mm <sup>-1</sup> )                                                                                                                            | 10.424                                          |
| F(000)                                                                                                                                               | 4128                                            |
| Data/restraints/parameters                                                                                                                           | 5331/0/236                                      |
| GOF on <i>F</i> <sup>2</sup>                                                                                                                         | 1.068                                           |
| <i>R</i> <sub>1</sub> , <i>wR</i> <sub>2</sub> ( <i>I</i> > 2σ( <i>I</i> )) <sup>a</sup>                                                             | 0.0297, 0.0521                                  |
| <i>R</i> <sub>1</sub> , <i>wR</i> <sub>2</sub> (all data) <sup>a</sup>                                                                               | 0.0404, 0.0556                                  |
| Largest diff peak/hole, e <sup>-</sup> ·Å <sup>-3</sup>                                                                                              | 0.67/-0.76                                      |
| <sup>a</sup> $R_1 = \sum   F_o  -  F_c   / \sum  F_o $ , and $wR_2 = [\sum w(F_o^2 - F_c^2)^2 / \sum w(F_o^2)^2]^{1/2}$ for $F_o^2 > 2\sigma(F_o^2)$ |                                                 |

Table S2. Atomic coordinates, equivalent isotropic displacement

parameters and bond valence calculation for Na<sub>4</sub>Ga<sub>8</sub>S<sub>14</sub>.

| Atom | Wyckoff | X       | Y       | Z       | Ueq   | BVS  |
|------|---------|---------|---------|---------|-------|------|
| Na1  | 8c      | -364(1) | 2292(2) | 4448(1) | 31(1) | 1.2  |
| Na2  | 8c      | 3712(2) | 9360(2) | 5489(1) | 49(1) | 0.79 |
| Na3  | 8c      | 5683(1) | 8150(2) | 6963(1) | 36(1) | 1    |
| Na4  | 8c      | 5934(1) | 4269(2) | 6924(1) | 35(1) | 1.22 |
| Ga1  | 8c      | 5819(1) | 6356(1) | 5826(1) | 13(1) | 2.97 |
| Ga2  | 8c      | 3563(1) | 5545(1) | 6377(1) | 13(1) | 2.97 |
| Ga3  | 8c      | 3584(1) | 5976(1) | 5258(1) | 15(1) | 2.89 |
| Ga4  | 8c      | 2188(1) | 6123(1) | 4447(1) | 14(1) | 2.97 |
| Ga5  | 8c      | 1484(1) | 3789(1) | 3750(1) | 14(1) | 2.85 |
| Ga6  | 8c      | 2206(1) | 4046(1) | 2537(1) | 14(1) | 2.88 |
| Ga7  | 8c      | 1975(1) | 1613(1) | 1839(1) | 13(1) | 2.93 |
| Ga8  | 8c      | 4008(1) | 3800(1) | 1695(1) | 13(1) | 2.91 |
| S1   | 8c      | 6209(1) | 4576(1) | 5512(1) | 15(1) | 1.98 |
| S2   | 8c      | 5108(1) | 6128(1) | 6490(1) | 16(1) | 2.24 |
| S3   | 8c      | 2402(1) | 7015(1) | 6350(1) | 13(1) | 1.92 |
| S4   | 8c      | 3367(1) | 4519(1) | 5743(1) | 18(1) | 2.08 |
| S5   | 8c      | 4810(1) | 7283(1) | 5350(1) | 16(1) | 2.06 |
| S6   | 8c      | 2130(1) | 6882(1) | 5135(1) | 23(1) | 1.88 |
| S7   | 8c      | 1046(1) | 4731(1) | 4379(1) | 18(1) | 1.72 |
| S8   | 8c      | 2126(1) | 7548(1) | 3905(1) | 14(1) | 1.91 |
| S9   | 8c      | 211(1)  | 2611(1) | 3575(1) | 14(1) | 2.07 |
| S10  | 8c      | 2024(1) | 4977(1) | 3201(1) | 16(1) | 1.92 |
| S11  | 8c      | 3837(1) | 3766(1) | 2440(1) | 17(1) | 1.95 |
| S12  | 8c      | 1284(1) | 2439(1) | 2439(1) | 17(1) | 2    |
| S13  | 8c      | 3340(1) | 508(1)  | 2028(1) | 13(1) | 1.87 |
| S14  | 8c      | 4161(1) | 5630(1) | 1437(1) | 17(1) | 1.93 |

Table S3. Selected bond lengths [Å] for Na<sub>4</sub>Ga<sub>8</sub>S<sub>14</sub>.

| Atom              | Atom            | Length/Å   | Atom | Atom             | Length/Å   |
|-------------------|-----------------|------------|------|------------------|------------|
| Na1               | S7              | 3.399(2)   | Ga2  | S13 <sup>2</sup> | 2.3156(10) |
| Na1               | S9              | 2.7553(19) | Ga2  | S2               | 2.2198(11) |
| Na1 <sup>11</sup> | S1              | 3.025(2)   | Ga2  | S3               | 2.3089(11) |
| Na1 <sup>11</sup> | S4              | 2.758(2)   | Ga2  | S4               | 2.2532(10) |
| Na1 <sup>13</sup> | S6              | 2.857(2)   | Ga3  | S1 <sup>7</sup>  | 2.4089(10) |
| Na1 <sup>6</sup>  | S5              | 2.8035(19) | Ga3  | S4               | 2.2359(11) |
| Na2               | S5              | 2.843(2)   | Ga3  | S5               | 2.2552(11) |
| Na2 <sup>12</sup> | S14             | 2.904(2)   | Ga3  | S6               | 2.2548(11) |
| Na2 <sup>3</sup>  | S4              | 2.920(2)   | Ga4  | S1 <sup>7</sup>  | 2.3160(11) |
| Na2 <sup>3</sup>  | S6              | 3.291(2)   | Ga4  | S6               | 2.2394(11) |
| Na2 <sup>3</sup>  | S7              | 3.370(2)   | Ga4  | S7               | 2.2326(11) |
| Na2 <sup>8</sup>  | S7              | 3.348(3)   | Ga4  | S8               | 2.3102(10) |
| Na3               | S2              | 2.831(2)   | Ga5  | S10              | 2.2603(10) |
| Na3 <sup>12</sup> | S14             | 2.947(2)   | Ga5  | S7               | 2.2527(10) |
| Na3 <sup>4</sup>  | S12             | 3.094(2)   | Ga5  | S8 <sup>3</sup>  | 2.4049(10) |
| Na3 <sup>7</sup>  | S11             | 2.911(2)   | Ga5  | S9               | 2.2526(11) |
| Na3 <sup>8</sup>  | S8              | 3.348(2)   | Ga6  | S10              | 2.2707(10) |
| Na3 <sup>8</sup>  | S10             | 2.857(2)   | Ga6  | S11              | 2.2489(11) |
| Na4               | S2              | 2.740(2)   | Ga6  | S12              | 2.2478(11) |
| Na4 <sup>10</sup> | S9              | 2.804(2)   | Ga6  | S13 <sup>6</sup> | 2.3863(10) |
| Na4 <sup>10</sup> | S12             | 2.779(2)   | Ga7  | S12              | 2.2369(10) |
| Na4 <sup>7</sup>  | S10             | 2.920(2)   | Ga7  | S13              | 2.3123(10) |
| Na4 <sup>7</sup>  | S11             | 2.972(2)   | Ga7  | S14 <sup>3</sup> | 2.2547(11) |
| Na4 <sup>9</sup>  | S13             | 3.532(2)   | Ga7  | S3 <sup>4</sup>  | 2.3120(10) |
| Ga1               | S1              | 2.3149(11) | Ga8  | S11              | 2.2436(10) |
| Ga1               | S2              | 2.2248(10) | Ga8  | S14              | 2.2515(11) |
| Ga1               | S5              | 2.2440(10) | Ga8  | S3 <sup>4</sup>  | 2.3626(10) |
| Ga1               | S8 <sup>1</sup> | 2.3159(10) | Ga8  | S9 <sup>5</sup>  | 2.2738(10) |

<sup>1</sup>x+1/2,-y+3/2,-z+1; <sup>2</sup>x,-y+1/2,z+1/2; <sup>3</sup>-x+1/2,y-1/2,z; <sup>4</sup>-x+1/2,-y+1,z-1/2;

<sup>5</sup>x+1/2,y,-z+1/2; <sup>6</sup>-x+1/2,y+1/2,z;<sup>7</sup>-x+1,-y+1,-z+1; <sup>8</sup>x-1/2,-y+3/2,-z+1;

<sup>9</sup>x,-y+1/2,z-1/2; <sup>10</sup>x-1/2,-y+1/2,-z+1;<sup>11</sup>x+1/2,-y+1/2,-z+1; <sup>12</sup>x,-y+3/2,z-1/2;

<sup>13</sup>-x,-y+1,-z+1; <sup>14</sup>-x+1,y+1/2,-z+3/2;<sup>15</sup>-x+1/2,-y+1,z+1/2; <sup>16</sup>x-1/2,y,-z+1/2;

<sup>17</sup>x,-y+3/2,z+1/2; <sup>18</sup>-x+1,y-1/2,-z+3/2

Table S4 Selected angles [°] for Na<sub>4</sub>Ga<sub>8</sub>S<sub>14</sub>.

| Atom             | Atom | Atom             | Angle/°   | Atom              | Atom | Atom              | Angle/°   |
|------------------|------|------------------|-----------|-------------------|------|-------------------|-----------|
| S1               | Ga1  | S8 <sup>1</sup>  | 116.66(4) | S5 <sup>3</sup>   | Na1  | S1 <sup>10</sup>  | 76.76(5)  |
| S5               | Ga1  | S8 <sup>1</sup>  | 115.29(4) | S5 <sup>3</sup>   | Na1  | S7                | 84.95(5)  |
| S5               | Ga1  | S1               | 107.41(4) | S5 <sup>3</sup>   | Na1  | S6 <sup>13</sup>  | 78.70(5)  |
| S2               | Ga1  | S8 <sup>1</sup>  | 94.77(4)  | S4 <sup>10</sup>  | Na1  | S1 <sup>10</sup>  | 84.83(6)  |
| S2               | Ga1  | S1               | 111.01(4) | S4 <sup>10</sup>  | Na1  | S5 <sup>3</sup>   | 111.32(7) |
| S2               | Ga1  | S5               | 111.23(4) | S4 <sup>10</sup>  | Na1  | S7                | 163.65(7) |
| S3               | Ga2  | S13 <sup>2</sup> | 108.91(4) | S4 <sup>10</sup>  | Na1  | S6 <sup>13</sup>  | 79.73(6)  |
| S4               | Ga2  | S3               | 105.83(4) | S6 <sup>13</sup>  | Na1  | S1 <sup>10</sup>  | 143.77(7) |
| S4               | Ga2  | S13 <sup>2</sup> | 114.94(4) | S6 <sup>13</sup>  | Na1  | S7                | 102.81(6) |
| S2               | Ga2  | S3               | 115.11(4) | S10 <sup>1</sup>  | Na3  | S8 <sup>1</sup>   | 71.21(5)  |
| S2               | Ga2  | S13 <sup>2</sup> | 98.76(4)  | S10 <sup>1</sup>  | Na3  | S14 <sup>17</sup> | 89.61(6)  |
| S2               | Ga2  | S4               | 113.44(4) | S10 <sup>1</sup>  | Na3  | S12 <sup>15</sup> | 142.16(8) |
| S9               | Ga5  | S8 <sup>3</sup>  | 106.62(4) | S10 <sup>1</sup>  | Na3  | S11 <sup>7</sup>  | 122.28(7) |
| S9               | Ga5  | S10              | 116.13(4) | S14 <sup>17</sup> | Na3  | S8 <sup>1</sup>   | 96.11(6)  |
| S9               | Ga5  | S7               | 106.45(4) | S14 <sup>17</sup> | Na3  | S12 <sup>15</sup> | 75.48(5)  |
| S10              | Ga5  | S8 <sup>3</sup>  | 104.28(4) | S12 <sup>15</sup> | Na3  | S8 <sup>1</sup>   | 143.76(7) |
| S7               | Ga5  | S8 <sup>3</sup>  | 109.24(4) | S2                | Na3  | S8 <sup>1</sup>   | 64.87(5)  |
| S7               | Ga5  | S10              | 113.77(4) | S2                | Na3  | S10 <sup>1</sup>  | 135.05(8) |
| S9 <sup>5</sup>  | Ga8  | S3 <sup>4</sup>  | 100.61(4) | S2                | Na3  | S14 <sup>17</sup> | 86.06(6)  |
| S14              | Ga8  | S3 <sup>4</sup>  | 107.14(4) | S2                | Na3  | S12 <sup>15</sup> | 79.28(5)  |
| S14              | Ga8  | S9 <sup>5</sup>  | 111.97(4) | S2                | Na3  | S11 <sup>7</sup>  | 75.37(5)  |
| S11              | Ga8  | S3 <sup>4</sup>  | 110.21(4) | S11 <sup>7</sup>  | Na3  | S8 <sup>1</sup>   | 99.55(6)  |
| S11              | Ga8  | S9 <sup>5</sup>  | 114.60(4) | S11 <sup>7</sup>  | Na3  | S14 <sup>17</sup> | 147.58(7) |
| S11              | Ga8  | S14              | 111.53(4) | S11 <sup>7</sup>  | Na3  | S12 <sup>15</sup> | 75.11(5)  |
| S3 <sup>4</sup>  | Ga7  | S13              | 103.86(4) | S9 <sup>11</sup>  | Na4  | S13 <sup>2</sup>  | 75.92(5)  |
| S14 <sup>3</sup> | Ga7  | S3 <sup>4</sup>  | 104.61(4) | S9 <sup>11</sup>  | Na4  | S10 <sup>7</sup>  | 119.39(8) |
| S14 <sup>3</sup> | Ga7  | S13              | 113.57(4) | S9 <sup>11</sup>  | Na4  | S11 <sup>7</sup>  | 164.63(8) |
| S12              | Ga7  | S3 <sup>4</sup>  | 111.82(4) | S10 <sup>7</sup>  | Na4  | S13 <sup>2</sup>  | 158.41(7) |
| S12              | Ga7  | S13              | 111.66(4) | S10 <sup>7</sup>  | Na4  | S11 <sup>7</sup>  | 75.97(5)  |
| S12              | Ga7  | S14 <sup>3</sup> | 110.92(4) | S12 <sup>11</sup> | Na4  | S13 <sup>2</sup>  | 99.21(6)  |
| S10              | Ga6  | S13 <sup>6</sup> | 101.13(4) | S12 <sup>11</sup> | Na4  | S9 <sup>11</sup>  | 83.15(6)  |
| S12              | Ga6  | S13 <sup>6</sup> | 108.89(4) | S12 <sup>11</sup> | Na4  | S10 <sup>7</sup>  | 97.83(6)  |
| S12              | Ga6  | S10              | 116.26(4) | S12 <sup>11</sup> | Na4  | S11 <sup>7</sup>  | 94.54(6)  |
| S12              | Ga6  | S11              | 114.15(4) | S2                | Na4  | S13 <sup>2</sup>  | 65.18(5)  |
| S11              | Ga6  | S13 <sup>6</sup> | 108.75(4) | S2                | Na4  | S9 <sup>11</sup>  | 101.92(6) |
| S11              | Ga6  | S10              | 106.71(4) | S2                | Na4  | S10 <sup>7</sup>  | 95.37(6)  |

|                  |     |                  |           |                   |     |                   |           |
|------------------|-----|------------------|-----------|-------------------|-----|-------------------|-----------|
| S5               | Ga3 | S1 <sup>7</sup>  | 101.89(4) | S2                | Na4 | S12 <sup>11</sup> | 161.18(9) |
| S4               | Ga3 | S1 <sup>7</sup>  | 116.10(4) | S2                | Na4 | S11 <sup>7</sup>  | 75.72(5)  |
| S4               | Ga3 | S5               | 121.09(4) | S11 <sup>7</sup>  | Na4 | S13 <sup>2</sup>  | 89.52(6)  |
| S4               | Ga3 | S6               | 109.77(4) | S14 <sup>17</sup> | Na2 | S4 <sup>6</sup>   | 86.93(6)  |
| S6               | Ga3 | S1 <sup>7</sup>  | 93.83(4)  | S14 <sup>17</sup> | Na2 | S7 <sup>1</sup>   | 71.73(6)  |
| S6               | Ga3 | S5               | 110.69(4) | S14 <sup>17</sup> | Na2 | S7 <sup>6</sup>   | 160.87(9) |
| S8               | Ga4 | S1 <sup>7</sup>  | 108.47(4) | S14 <sup>17</sup> | Na2 | S6 <sup>6</sup>   | 112.60(7) |
| S7               | Ga4 | S8               | 114.75(4) | S5                | Na2 | S14 <sup>17</sup> | 92.16(6)  |
| S7               | Ga4 | S1 <sup>7</sup>  | 113.84(4) | S5                | Na2 | S4 <sup>6</sup>   | 126.42(9) |
| S7               | Ga4 | S6               | 109.88(4) | S5                | Na2 | S7 <sup>6</sup>   | 84.89(6)  |
| S6               | Ga4 | S8               | 111.71(4) | S5                | Na2 | S7 <sup>1</sup>   | 77.71(6)  |
| S6               | Ga4 | S1 <sup>7</sup>  | 96.83(4)  | S5                | Na2 | S6 <sup>6</sup>   | 150.89(8) |
| S9               | Na1 | S1 <sup>10</sup> | 86.18(5)  | S4 <sup>6</sup>   | Na2 | S7 <sup>6</sup>   | 110.02(7) |
| S9               | Na1 | S5 <sup>3</sup>  | 147.16(8) | S4 <sup>6</sup>   | Na2 | S7 <sup>1</sup>   | 149.11(8) |
| S9               | Na1 | S4 <sup>10</sup> | 94.54(6)  | S4 <sup>6</sup>   | Na2 | S6 <sup>6</sup>   | 72.25(5)  |
| S9               | Na1 | S7               | 70.93(5)  | S7 <sup>1</sup>   | Na2 | S7 <sup>6</sup>   | 89.20(6)  |
| S9               | Na1 | S6 <sup>13</sup> | 127.36(7) | S6 <sup>6</sup>   | Na2 | S7 <sup>6</sup>   | 66.66(5)  |
| S1 <sup>10</sup> | Na1 | S7               | 101.14(5) | S6 <sup>6</sup>   | Na2 | S7 <sup>1</sup>   | 95.16(7)  |

<sup>1</sup>x+1/2,-y+3/2,-z+1; <sup>2</sup>x,-y+1/2,z+1/2; <sup>3</sup>-x+1/2,y-1/2,z; <sup>4</sup>-x+1/2,-y+1,z-1/2;

<sup>5</sup>x+1/2,y,-z+1/2; <sup>6</sup>-x+1/2,y+1/2,z;<sup>7</sup>-x+1,-y+1,-z+1; <sup>8</sup>x-1/2,-y+3/2,-z+1;

<sup>9</sup>x,-y+1/2,z-1/2; <sup>10</sup>x-1/2,-y+1/2,-z+1;<sup>11</sup>x+1/2,-y+1/2,-z+1; <sup>12</sup>x,-y+3/2,z-1/2;

<sup>13</sup>-x,-y+1,-z+1; <sup>14</sup>-x+1,y+1/2,-z+3/2;<sup>15</sup> -x+1/2,-y+1,z+1/2; <sup>16</sup> x-1/2,y,-z+1/2;

<sup>17</sup> x,-y+3/2,z+1/2; <sup>18</sup> -x+1,y-1/2,-z+3/2

Table S5. Anisotropic displacement parameters for Na<sub>4</sub>Ga<sub>8</sub>S<sub>14</sub>.

|     | U <sup>11</sup> | U <sup>22</sup> | U <sup>33</sup> | U <sup>23</sup> | U <sup>13</sup> | U <sup>12</sup> |
|-----|-----------------|-----------------|-----------------|-----------------|-----------------|-----------------|
| Na1 | 32(1)           | 38(1)           | 22(1)           | 0(1)            | 3(1)            | -1(1)           |
| Na2 | 49(1)           | 54(2)           | 44(1)           | 3(1)            | 8(1)            | 25(1)           |
| Na3 | 33(1)           | 26(1)           | 49(1)           | 3(1)            | -8(1)           | -5(1)           |
| Na4 | 49(1)           | 23(1)           | 34(1)           | 4(1)            | -18(1)          | -5(1)           |
| Ga1 | 12(1)           | 15(1)           | 12(1)           | 0(1)            | 0(1)            | 0(1)            |
| Ga2 | 13(1)           | 15(1)           | 12(1)           | 0(1)            | 1(1)            | -1(1)           |
| Ga3 | 14(1)           | 18(1)           | 15(1)           | 0(1)            | -3(1)           | 0(1)            |
| Ga4 | 15(1)           | 16(1)           | 12(1)           | -1(1)           | -2(1)           | 1(1)            |
| Ga5 | 12(1)           | 16(1)           | 13(1)           | 0(1)            | 0(1)            | -1(1)           |
| Ga6 | 15(1)           | 14(1)           | 12(1)           | -1(1)           | 1(1)            | 0(1)            |
| Ga7 | 14(1)           | 12(1)           | 14(1)           | 0(1)            | 0(1)            | 0(1)            |
| Ga8 | 12(1)           | 14(1)           | 14(1)           | -1(1)           | 1(1)            | 1(1)            |
| S1  | 14(1)           | 16(1)           | 14(1)           | -4(1)           | 0(1)            | 3(1)            |
| S2  | 14(1)           | 21(1)           | 13(1)           | 0(1)            | 1(1)            | -4(1)           |
| S3  | 13(1)           | 13(1)           | 13(1)           | 0(1)            | 0(1)            | 0(1)            |
| S4  | 24(1)           | 15(1)           | 13(1)           | -2(1)           | 0(1)            | -1(1)           |
| S5  | 18(1)           | 15(1)           | 17(1)           | 2(1)            | -5(1)           | -1(1)           |
| S6  | 20(1)           | 34(1)           | 16(1)           | -9(1)           | -4(1)           | 12(1)           |
| S7  | 17(1)           | 21(1)           | 16(1)           | -4(1)           | 5(1)            | -3(1)           |
| S8  | 12(1)           | 14(1)           | 16(1)           | 1(1)            | 2(1)            | 1(1)            |
| S9  | 12(1)           | 13(1)           | 17(1)           | 0(1)            | -2(1)           | 0(1)            |
| S10 | 22(1)           | 15(1)           | 12(1)           | -1(1)           | 4(1)            | 0(1)            |
| S11 | 15(1)           | 25(1)           | 12(1)           | -1(1)           | 0(1)            | 3(1)            |
| S12 | 20(1)           | 15(1)           | 16(1)           | -2(1)           | 5(1)            | -3(1)           |
| S13 | 14(1)           | 13(1)           | 13(1)           | 0(1)            | 1(1)            | 1(1)            |
| S14 | 17(1)           | 13(1)           | 20(1)           | 0(1)            | 4(1)            | 1(1)            |

Table S6. The quantitative element analyses based on EDS spectrum

(Figure S2) in  $\text{Na}_4\text{Ga}_8\text{S}_{14}$ .

| Element | Wt%    | Wt% Sigma | Atomic % |
|---------|--------|-----------|----------|
| Na      | 8.47   | 0.23      | 15.14    |
| S       | 44.60  | 0.33      | 57.19    |
| Ga      | 46.93  | 0.35      | 27.67    |
| Total:  | 100.00 |           | 100.00   |



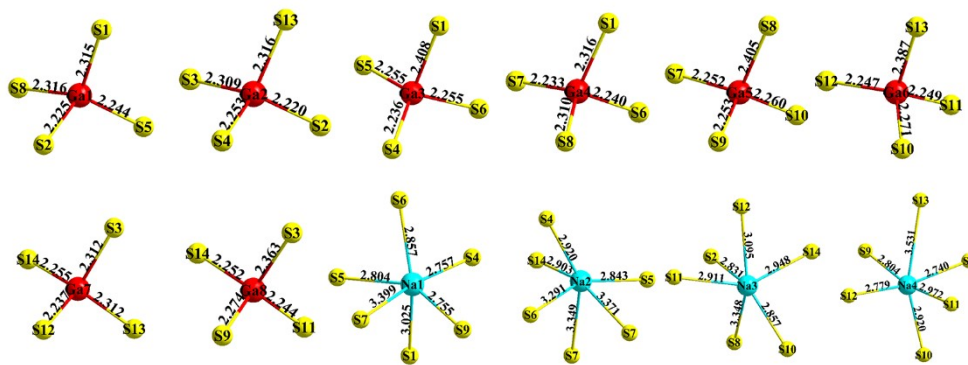

**Figure S1.** (a) The coordination environments and bond lengths of the [GaS<sub>4</sub>] tetrahedral units and [NaS<sub>6</sub>] polyhedral groups in Na<sub>4</sub>Ga<sub>8</sub>S<sub>14</sub>.

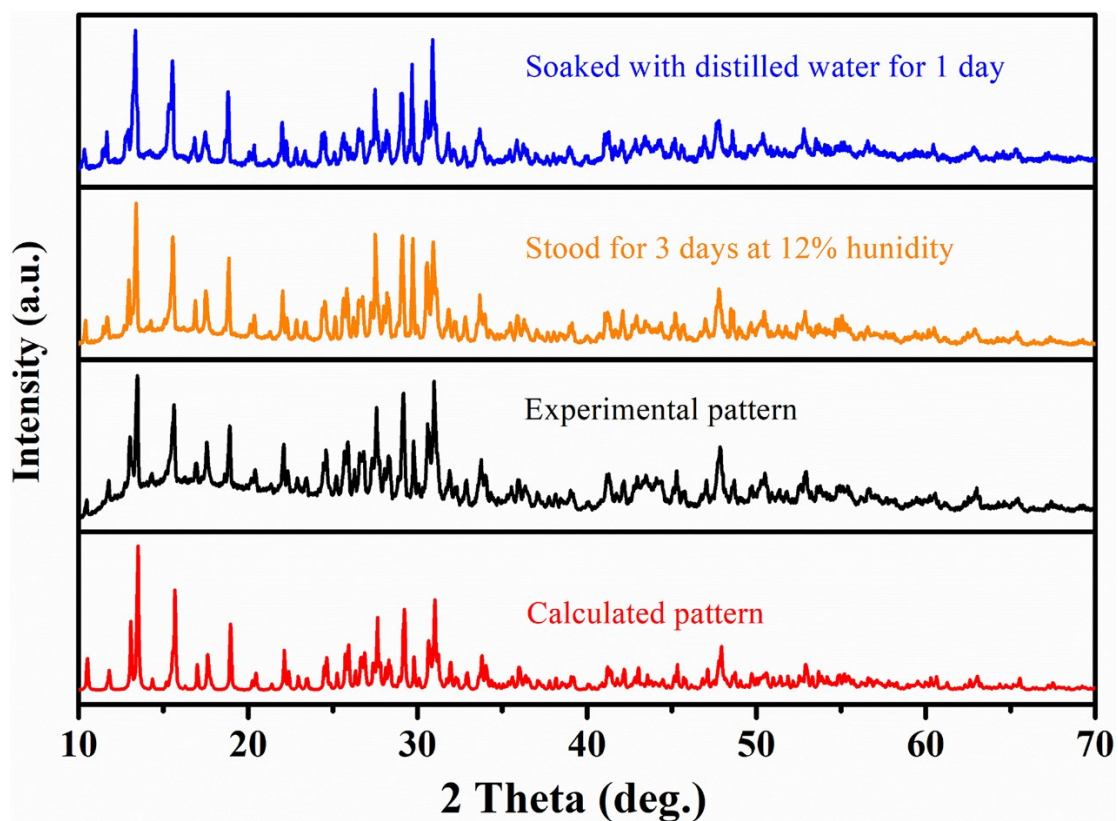

**Figure S2.** The experimental and theoretical powder X-ray diffraction patterns of  $\text{Na}_4\text{Ga}_8\text{S}_{14}$ .

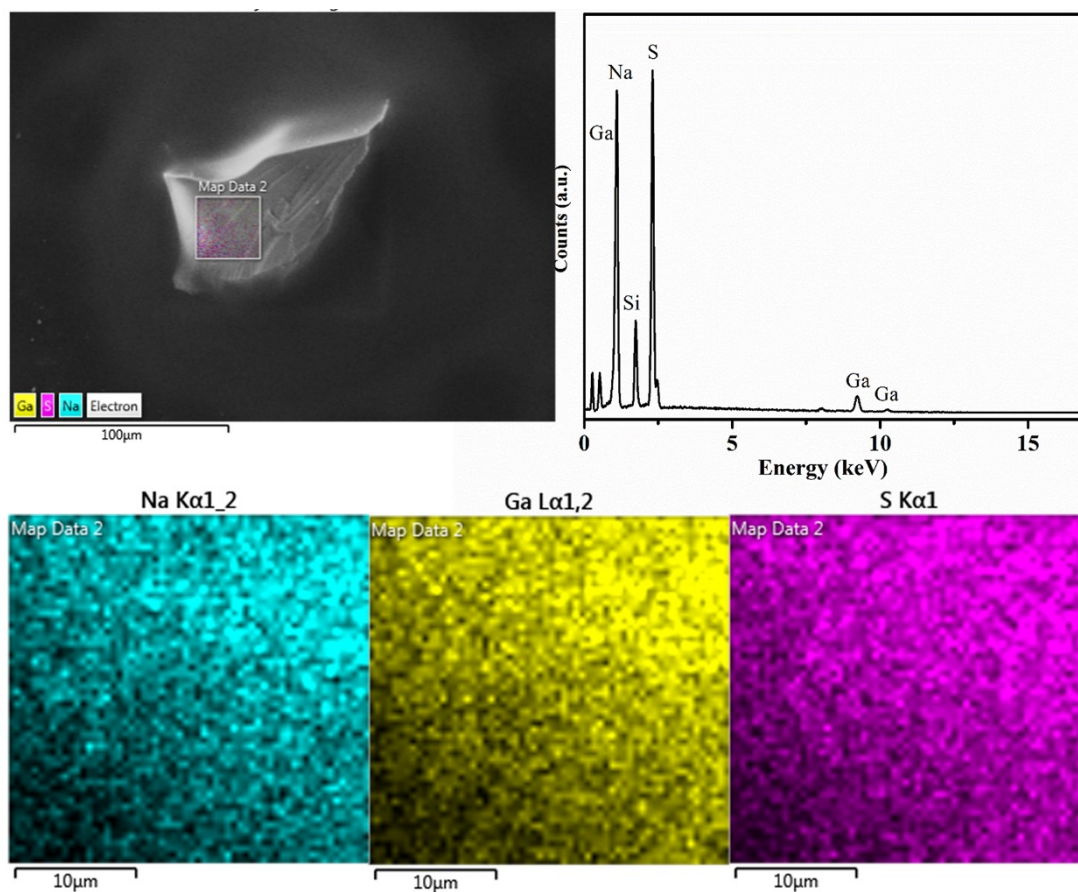

**Figure S3.** The SEM image, EDS spectrum and mappings of  $\text{Na}_4\text{Ga}_8\text{S}_{14}$ .
